# Supplementary material for: Gene Regulation and Epigenetic Remodeling in Murine Embryonic Stem Cells by c-Myc
Source: PubMed Central journal article supplement (PMC2773118; doi:10.1371/journal.pone.0007839), 2009-11-13

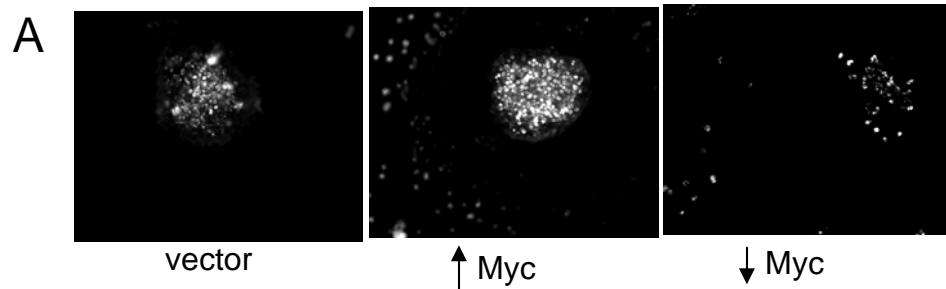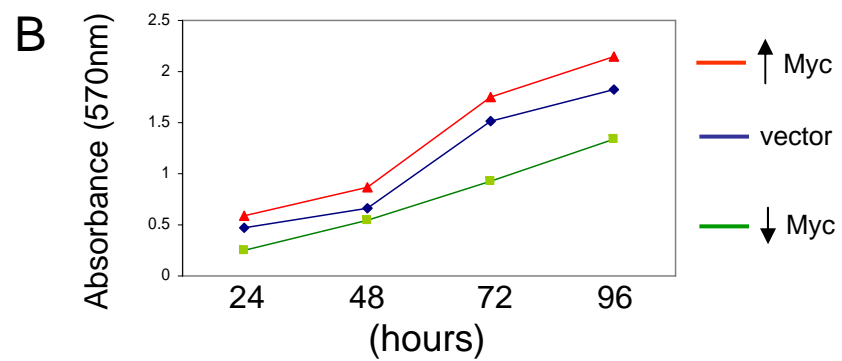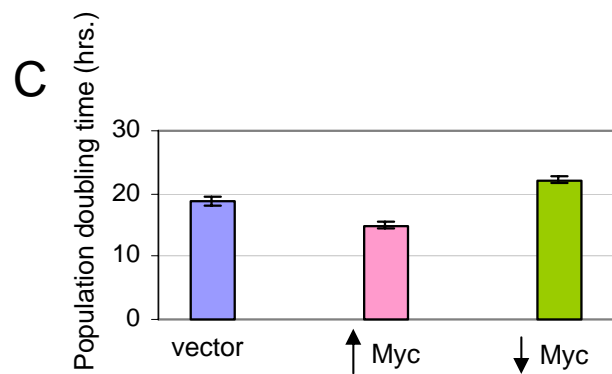

Supplement: pone.0007839.s003.pdf [file pone.0007839.s003.pdf]
